# Supplementary material for: Highly efficient CsPbBr3@glass@polyurethane composite film as flexible liquid crystal display backlight
Source: Royal Society of Chemistry journal article supplement (doi:10.1039/d3dt00499f), 2023-01-01
Supplement: d3dt00499f1.pdf [file d3dt00499f1.pdf]

## Supporting Information

# Highly efficiency CsPbBr<sub>3</sub>@glass@polyurethane Composite Film for Flexible Liquid Crystal Displays Backlight

Guoxing Zhang<sup>1</sup>, Dongliang Jiang<sup>1</sup>, Xinghua Zhu<sup>1</sup>, Yuemei Lan<sup>1</sup>, Dong Wang<sup>1</sup>,  
Xuejie Zhang<sup>2</sup>, Bo Wang<sup>1</sup>, Yan Gao<sup>1</sup>, Qingguang Zeng<sup>1</sup>, Yan Chen<sup>1\*</sup>

<sup>1</sup> School of Applied Physics and Materials , Wuyi University, Jiangmen, Guangdong  
529020, P. R. China

<sup>2</sup> College of Materials and Energy, South China Agricultural University, Guangzhou  
510642, China

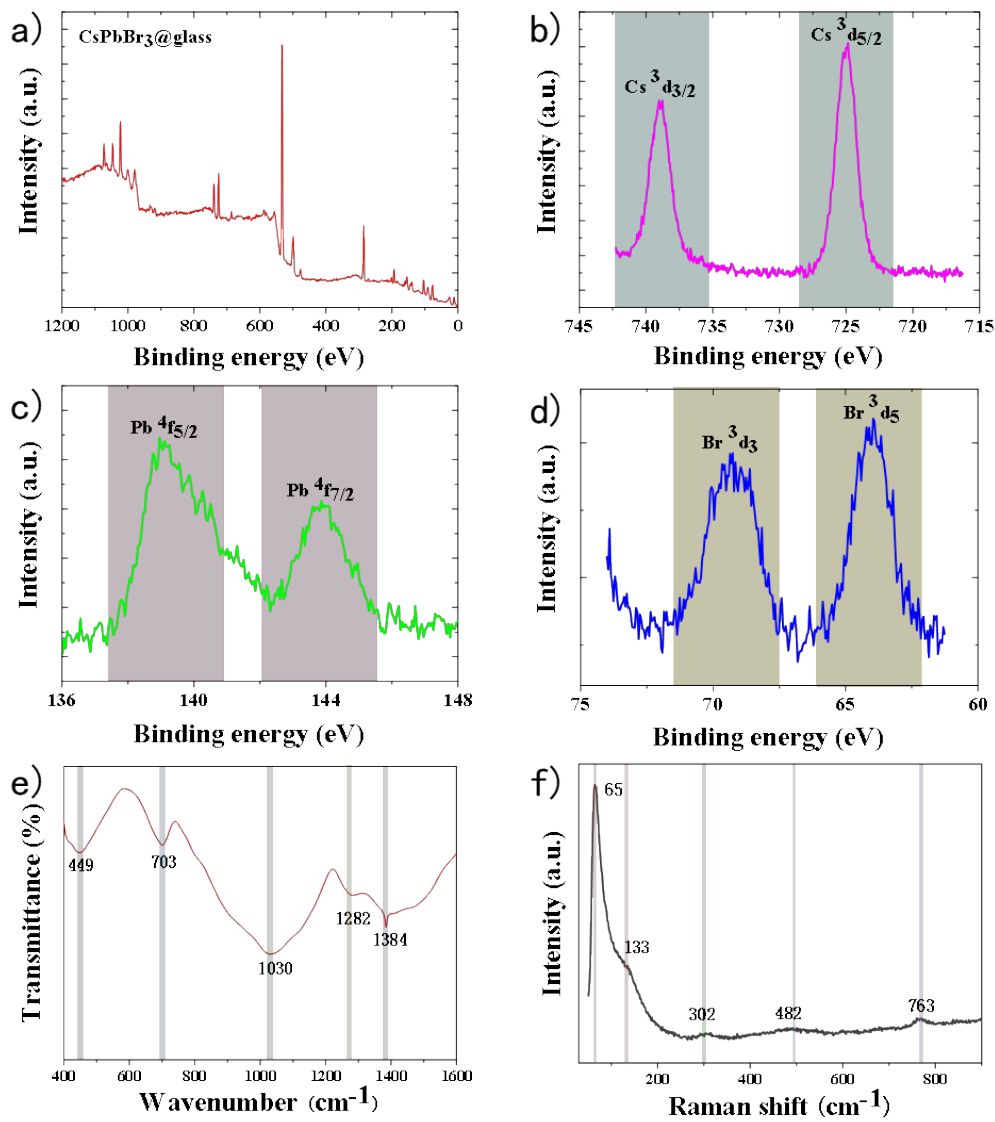

Fig. S1. a) The XPS spectrum of CsPbBr<sub>3</sub>@glass (a). Corresponding high-resolution spectra of Cs (b), Pb (c), Br (d). The FTIR spectrum (e) and Raman spectrum (f) of CsPbBr<sub>3</sub>@glass.
